# Supplementary material for: Development of Molecular Marker Linked to Seed Hardness in Pomegranate Using Bulked Segregant Analysis
Source: MDPI journal article supplement (doi:10.3390/life13051123), 2023-05-01
Supplement: s1 [file s1]

Supplementary Table S1. Names and sequences of RAPD primers used

| Primer Name | Sekans     | Primer Name | Sekans     | Primer Name | Sekans      | Primer Name | Sekans      |
|-------------|------------|-------------|------------|-------------|-------------|-------------|-------------|
| OPAY-01     | GTCCACCTCT | OPS-01      | CTACTGCGCT | OPR-01      | TGCGGGTCCT  | OPQ-01      | GGGACGATGG  |
| OPAY-02     | TGCGAAGGCT | OPS-02      | CCTCTGACTG | OPR-02      | CACAGCTGCC  | OPQ-02      | TCTGTCGGTC  |
| OPAY-03     | TTTCCGGGAG | OPS-03      | CAGAGGTCCC | OPR-03      | ACACAGAGGG  | OPQ-03      | GGTCACCTCA  |
| OPAY-04     | AAGGCTCGAC | OPS-04      | CACCCCTTG  | OPR-04      | CCCGTAGCAC  | OPQ-04      | AGTGCCTGA   |
| OPAY-05     | TCGCTGCGTT | OPS-05      | TTTGGGGCCT | OPR-05      | GACCTAGTGG  | OPQ-05      | CCGCGTCTTG  |
| OPAY-06     | GGCTTCGCAA | OPS-06      | GATACCTCGG | OPR-06      | GTCTACGGCA  | OPQ-06      | GAGCGCCTTG  |
| OPAY-07     | GACCGTCTGT | OPS-07      | TCCGATGCTG | OPR-07      | ACTGGCCTGA  | OPQ-07      | CCCCGATGGT  |
| OPAY-08     | AGGCTTCCCT | OPS-08      | TTCAGGTGG  | OPR-09      | TGAGCACGAG  | OPQ-08      | CTCCAGCGGA  |
| OPAY-09     | CCGATCCAAC | OPS-09      | TCCTGGTCCC | OPR-10      | CCATTCCCCA  | OPQ-09      | GGCTAACCGA  |
| OPAY-10     | CAAGGCCCT  | OPS-10      | ACCGTTCCAG | OPR-11      | GTAGCCGTCT  | OPQ-10      | TGTGCCCCAA  |
| OPAY-11     | ACGCGCCTTC | OPS-11      | AGTCGGGTGG | OPR-12      | ACAGGTGCGT  | OPQ-11      | TCTCCGCAAC  |
| OPAY-12     | CTGTGCGCGT | OPS-12      | CTGGGTGAGT | OPR-13      | GGACGACAAG  | OPQ-12      | AGTAGGGCAC  |
| OPAY-13     | CCGCTCGTAA | OPS-13      | GTCGTTCTG  | OPR-14      | CAGGATTCCC  | OPQ-13      | GGAGTGAGACA |
| OPAY-14     | GGTGGGTAGA | OPS-14      | AAAGGGGTCC | OPR-15      | GGACAACGAG  | OPQ-14      | GGACGCTTCA  |
| OPAY-15     | CCAAGAGGCA | OPS-15      | CAGTTCACGG | OPR-16      | CTCTGCGCGT  | OPQ-15      | GGGTAACGTG  |
| OPAY-16     | GGTGTGGTTC | OPS-16      | AGGGGGTTCC | OPR-17      | CCGTACGTAG  | OPQ-16      | AGTGCAGCCA  |
| OPAY-17     | GGTGATTCGG | OPS-17      | TGGGGACCAC | OPR-18      | GGCTTTGCCA  | OPQ-17      | GAAGCCCTTG  |
| OPAY-18     | ACCCCAACCA | OPS-18      | CTGGCGAACT | OPR-19      | CCTCCTCATC  | OPQ-18      | AGGCTGGGTG  |
| OPAY-19     | AACTTGGCCC | OPS-19      | GAGTCAGCAG | OPR-20      | ACGGCAAGGA  | OPQ-19      | CCCCCTATCA  |
| OPAY-20     | TCATTCGCCC | OPS-20      | TCTGGACGGA | OPM-01      | GTTGGTGGCT  | OPQ-20      | TCGCCCAGTC  |
| OPK-01      | CATTGAGGCC | OPL-01      | GGCATGACCT | OPM-02      | ACAACGCCTC  | OPN-01      | CTCACGTTGG  |
| OPK-02      | GTCTCCGCAA | OPL-02      | TGGGCGTCAA | OPM-03      | GGGGGATGAG  | OPN-02      | ACCAGGGGCA  |
| OPK-03      | CCAGCTTAGG | OPL-03      | CCAGCAGCTT | OPM-04      | GGCGGTTGTC  | OPN-03      | GGTACTCCCC  |
| OPK-04      | CCGCCCAAAC | OPL-04      | GACTGCACAC | OPM-05      | GGGAACGTGT  | OPN-04      | GACCGACCCA  |
| OPK-05      | TCTGTCGAGG | OPL-05      | ACGCAGGCAC | OPM-06      | CTGGGCAACT  | OPN-05      | ACTGAACGCC  |
| OPK-06      | CACCTTCCCC | OPL-06      | GAGGGAAGAG | OPM-07      | CCGTGACTCA  | OPN-06      | GAGACGCACA  |
| OPK-07      | AGCGAGCAAG | OPL-07      | AGGCGGGAAC | OPM-08      | TCTGTTCCCC  | OPN-07      | CAGCCCAGAG  |
| OPK-08      | GAACACTGGG | OPL-08      | AGCAGGTGGA | OPM-09      | GTCTTGCGGA  | OPN-08      | ACCTCAGCTC  |
| OPK-09      | CCCTACCGAC | OPL-09      | TGCGAGAGTC | OPM-10      | TCTGGCGCAC  | OPN-09      | TGCCGGCTTG  |
| OPK-10      | GTGCAACGTG | OPL-10      | TGGGAGATGG | OPM-11      | GTCCACTGTG  | OPN-10      | ACAACTGGGG  |
| OPK-11      | AATGCCCCAG | OPL-11      | ACGATGAGCC | OPM-12      | GGGACGTTGG  | OPN-11      | TCGCCGCAAA  |
| OPK-12      | TGGCCCTCAC | OPL-12      | GGGCGGTACT | OPM-13      | GGTGGTCAAG  | OPN-12      | CACAGACACC  |
| OPK-13      | GGTTGTACCC | OPL-13      | ACCGCCTGCT | OPM-14      | AGGGTCGTTC  | OPN-13      | AGCGTCACTC  |
| OPK-14      | CCCCTACAC  | OPL-14      | GTGACAGGCT | OPM-15      | GACCTACCAC  | OPN-14      | TCGTGCGGGT  |
| OPK-15      | CTCCTGCCAA | OPL-15      | AAGAGAGGGG | OPM-16      | GTAACCAGCC  | OPN-15      | CAGCGACTGT  |
| OPK-16      | GAGCGTCGAA | OPL-16      | AGGTTGCAGG | OPM-17      | TCAGTCCGGG  | OPN-16      | AAGCGACCTG  |
| OPK-17      | CCCAGCTGTG | OPL-17      | AGCCTGAGCC | OPM-18      | CACCATCCGT  | OPN-17      | CATTGGGGAG  |
| OPK-18      | CCTAGTCGAG | OPL-18      | ACCACCCACC | OPM-19      | CCTTCAGGCA  | OPN-18      | GGTGAGGTCA  |
| OPK-19      | CACAGGCGGA | OPL-19      | GAGTGGTGAC | OPM-20      | AGGTCTTGGG  | OPN-19      | GTCCGTACTG  |
| OPK-20      | GTGTCGCGAG | OPL-20      | TGGTGGACCA | Y-4         | GTTTCGCTCCT | OPN-20      | GGTGCTCCGT  |
| OPA-04      | AATCGGGCTG | OPBD-17     | GTTCGCTCCC | Y-6         | GTTTCGCTCCC | OPE-01      | CCCAAGGTCC  |
| OPA-19      | CAAACGTCGG | OPBC-08     | GGTCTTCCCT | Y-9         | CTGCTGGGACA | OPE-02      | GGTGCGGGAA  |
| OPH-07      | CAAACGTCGG | OPH-18      | GAATCGGCCA | Y-22        | GGACCCAACCT | OPE-03      | CCAGATGCAC  |

|         |            |         |            |        |             |        |            |
|---------|------------|---------|------------|--------|-------------|--------|------------|
| OPH-08  | GAAACACCCC | OPY-06  | AAGGCTCACC | Y-30   | GTGTGCCCCAC | OPE-04 | GTGACATGCC |
| OPAD-10 | AAGAGGCCAG | OPY-07  | AGAGCCGTCA | Y-34   | AAGCCTCGTCT | OPE-05 | TCAGGGAGGT |
| OPAG-08 | AAGAGCCCTC | OPY-11  | AGACGATGGG | Y-48   | ACGACCGACAC | OPE-06 | AAGACCCCTC |
| OPAG-12 | AAGAGCCCTC | OPY-13  | GGGTCTCGGT | Y-51   | TGGTGGCGTTA | OPE-07 | AGATGCAGCC |
| OPAG-20 | CTCCCAGGGT | OPBA-03 | GTGCGAGAAC | Y-54   | TGGTGGCGTTC | OPE-08 | TCACCACGGT |
| OPAH-16 | TGCGCTCCTC | OPBA-06 | GGACGACCGT | Y-57   | ACCCCCGACTA | OPE-09 | CTTCACCCGA |
| OPAH-19 | CAAGGTGGGT | OPBB-09 | AGGCCGGTCA | D-5    | GTCAGAGTCCT | OPE-10 | CACCAGGTGA |
| OPAH-02 | GGCAGTTCTC | OPBB-13 | CTTCGGTGTG | OPAD18 | ACGAGAGGCA  | OPE-11 | GAGTCTCAGG |
| OPAI-08 | GGAAGGTGAG | OPAC-11 | CCTGGGTCAG | OPAE14 | GAGAGGCTCC  | OPE-12 | TTATCGCCCC |
| OPAI-18 | AAGCCCCCA  | OPAD-02 | CTGAACGCTG | OPAH20 | CACTTCCGCT  | OPE-13 | CCCATTCCGG |
| OPB-01  | TCGCAGCGAG | OPAD-04 | GTAGGCCTCA | OPAJ08 | TCGCGGAACC  | OPE-14 | TGCGGCTGAG |
| OPB-12  | TGATGGCGTC | OPAD-13 | GGTTCCTCTG | OPAJ14 | GTGCTCCCTC  | OPE-15 | ACGCACAACC |
| OPB-20  | CCTTGACGCA | OPAD-16 | AACGGGCGTC | OPAK19 | ACCGATGCTG  | OPE-16 | GGTGACTGTG |
| OPD-17  | GGACCCTTAC | OPAE-10 | CTGAAGCGCA | OPA02  | TGCCGAGCTG  | OPE-17 | CTACTGCCGT |
| OPX-19  | TTTCCACGG  | OPB-10  | CTGCTGGGAC | OPA05  | AGGGGTCTTG  | OPE-18 | GGACTGCAGA |
| OPBA-06 | GGACGACCGT | OPAD-15 | TTTGCCCCGT | OPA10  | GTGATCGCAG  | OPE-19 | ACGGCGTATG |
| OPBB-03 | TCACGTGGCT | OPP-02  | TCGGCACGCA | OPA13  | CAGCACCCAC  | OPE-20 | AACGGTGACC |
| OPBB-04 | ACCAGGTCAC | OPP-14  | CCAGCCGAAC | OPB05  | TGCGCCCTTC  | OPC08  | TGGACCGGTG |
| OPBB-07 | GAAGGCTGGG | MG-01   | AGCGCCGACG | OPC05  | GATGACCGCC  | OPC10  | TGTCTGGGTG |
| OPBB-08 | TCGTCAAGG  | MG-11   | AGGAGCTGCC | OPC06  | GAACGGACTC  | OPC12  | TGTCATCCCC |
| OPBB-10 | ACTTGCCTGG | MG-16   | GAAGAACCGC |        |             | OPI18  | TGCCCAGCCT |
| OPBD-07 | GAGCTGGTCC |         |            |        |             | OPR08  | CCCGTTGCCT |

Supplementary Table S2. Names and sequences of SSR primers used.

| Primer Name  | Nucleotide Sequence         | Primer Name | Nucleotide Sequence         |
|--------------|-----------------------------|-------------|-----------------------------|
| ABRII-MP26-F | 5-TTTCTCGAAGAATTGGGTAA-3    | FM994087-F  | 5-GCAAAGGAAACAAAAACAAA-3    |
| ABRII-MP26-R | 5-CTGAGTAAGCTGAGGCTGAT-3    | FM994087-R  | 5-TGATTGTATCCTCAGCTTCT-3    |
| ABRII-MP28-F | 5-ATCCTCTGTCTTTGTGTTTCG-3   | FM994097-F  | 5-ATGAATGAGGAAGACGAAAA-3    |
| ABRII-MP28-R | 5-TGAGTAATTCCGGTCAGAAG-3    | FM994097-R  | 5-GTGCTCCATCCATACAAAAT-3    |
| ABRII-MP42-F | 5-GAGCAGAGCAATTCAATCTC-3    | FM994094-F  | 5-GCCTATCTCGTGATCACATC-3    |
| ABRII-MP42-R | 5-AACAATTTCCCATGTTTGAC-3    | FM994094-R  | 5-AATGGGAGCGGACTAACTAT-3    |
| EPS01-F      | 5-TCTATTCCACATAGAAAGAGGGG-3 | FM994095-F  | 5-GGACTAGCACAACTCGTAGC-3    |
| EPS01-R      | 5-ATGATGTCTATGCAATTGGCTG-3  | FM994095-R  | 5-CAACAAAATGAGAAGGTGGT-3    |
| EPS03-F      | 5-CGCTGGTCACACTACTTACTCG-3  | pg4-F       | F: CTGATGTAATGGCTGAGCAAA    |
| EPS03-R      | 5-TTGTAGTGGAAGACACAGCAGC-3  | pg4-R       | R: GCACTTGAACAAAGAGAATGC    |
| EPS04-F      | 5-AAAGGGGAAAAAGACGAAGAAG-3  | pg6-F       | F: GGTTGCTCATCCCTTGACTC     |
| EPS04-R      | 5-CCCTGTCTTAAGTCTGAGTGG-3   | pg6-R       | R: GCGTCTGTAGTGTCTTAGGC     |
| EPS05-F      | 5-TTGTGGGTATTCTCTTCTC-3     | pg8-F       | F: CACCATAGACTTAAACGAGCACAA |
| EPS05-R      | 5-ACATCATACACCTTGCCCTC-3    | pg8-R       | R: GAAGCTCCATTGCCCTGTCC     |
| EPS06-F      | 5-AAATCGCATCCCTCCGTCT-3     | pg17-F      | F: CATCAGACTACGATGGCACT     |
| EPS06-R      | 5-CTGTTCCGCGAGGGTAAAGA-3    | pg17-R      | R: GCATAATAGCCTTCAATTTACA   |
| EPS08-F      | 5-TTCCCGAGAAAGTTGCATATCT-3  | pg18-F      | F: TCTAAGGGCAGAATGGCACT     |

|         |                            |           |                            |
|---------|----------------------------|-----------|----------------------------|
| EPS08-R | 5-TAGTCCGTGAGGATTTTGCCT-3  | pg18-R    | R: TGGCACTAGATCCGTAAATCT C |
| EPS09-F | 5-TAATCCCATTCCAAACAAGTCC-3 | PGCT006-F | F:TTGAATTGATGTAACGCTTG     |
| EPS09-R | 5-ATATTGACGGAGGCTTCACTGT-3 | PGCT006-R | R:GAGGAAAGTCGTTTGAAGTG     |
| EPS10-F | 5-TAGCACAGGGGAAATCTGAAAT-3 | PGCT015-F | F:GACGCCTTTAGTTTGCTCCA     |
| EPS10-R | 5-GGAAGAGTTTGGTTCAGGATTG-3 | PGCT015-R | R:CTCGGGACAGGACTTGAAT      |
| EPS19-F | 5-TGGGGATTATCGTTGTCTTCA-3  | PGCT033-F | F:TAATAAGCTGCCCCGAAGTC     |
| EPS19-R | 5-TCCAAGCTGAACTCGTTCCT-3   | PGCT033-R | R:CGGTGATGTCCCTATTGGAG     |
